# Supplementary material for: RbSb(SO4)(H2PO2)F: a short-wave UV antimony(iii) oxysalt with mixed-anions demonstrating enhanced birefringence
Source: Royal Society of Chemistry journal article supplement (doi:10.1039/d4tc02926g), 2024-01-01
Supplement: d4tc02926g1.pdf [file d4tc02926g1.pdf]

## Electronic Supporting Information

# **RbSb(SO<sub>4</sub>)(H<sub>2</sub>PO<sub>2</sub>)F: A Short-Wave UV Antimony(III) Oxysalt with Mixed-Anions Demonstrating Enhanced Birefringence**

*Jinwen Tan, <sup>a</sup> Han Luo, <sup>a</sup> Shiyi Wang, <sup>a</sup> Ling Huang, <sup>\*a</sup> Liling Cao, <sup>a</sup> Xuehua Dong, <sup>a</sup> and Guohong Zou, <sup>\*b</sup>*

<sup>a</sup> College of Chemistry and Materials Science, Sichuan Normal University, Chengdu 610066, P. R. China.

<sup>b</sup> College of Chemistry, Sichuan University, Chengdu 610065, P. R. China.

E-mail: huangl026@sina.com; zough@scu.edu.cn

### Table of contents

| Sections | Titles                                                                                                                                                                             | Pages |
|----------|------------------------------------------------------------------------------------------------------------------------------------------------------------------------------------|-------|
| Table S1 | Atomic coordinates ( $\times 10^4$ ) and equivalent isotropic displacement parameters ( $\text{\AA}^2 \times 10^3$ ) for RbSb(SO <sub>4</sub> )(H <sub>2</sub> PO <sub>2</sub> )F. | S2    |
| Table S2 | Selected Bond lengths [ $\text{\AA}$ ] and angles [ $^\circ$ ] for RbSb(SO <sub>4</sub> )(H <sub>2</sub> PO <sub>2</sub> )F.                                                       | S3    |
| Fig. S1  | The extinction diagram of RbSb(SO <sub>4</sub> )(H <sub>2</sub> PO <sub>2</sub> )F during the birefringence test.                                                                  | S4    |

**Table S1.** Fractional Atomic Coordinates ( $\times 10^4$ ) and Equivalent Isotropic Displacement Parameters ( $\text{\AA}^2 \times 10^3$ ) for  $\text{RbSb}(\text{SO}_4)(\text{H}_2\text{PO}_2)\text{F}$ .  $U_{eq}$  is defined as 1/3 of the trace of the orthogonalised  $U_{ij}$  tensor.

| atom  | $x$        | $y$      | $z$       | $U_{eq}(\text{\AA}^2)$ |
|-------|------------|----------|-----------|------------------------|
| Sb(1) | 6338.6(2)  | 7500     | 7725.8(3) | 16.59(11)              |
| Rb(1) | 4266.9(3)  | 2500     | 7207.7(4) | 29.79(13)              |
| S(1)  | 6573.3(5)  | 2500     | 5579.2(9) | 16.97(18)              |
| P(1)  | 6538.4(6)  | 12500    | 9969.6(9) | 17.7(2)                |
| O(1)  | 5065.8(14) | 7500     | 7708(2)   | 25.5(5)                |
| O(2)  | 6096.6(13) | 10165(3) | 9456(2)   | 29.9(4)                |
| O(3)  | 7308.1(17) | 2500     | 6645(3)   | 30.0(6)                |
| O(4)  | 6860(2)    | 2500     | 4032(3)   | 45.0(8)                |

**Table S2.** Selected Bond lengths [Å] and angles [°] for RbSb(SO<sub>4</sub>)(H<sub>2</sub>PO<sub>2</sub>)F.

|                          |            |                                             |            |
|--------------------------|------------|---------------------------------------------|------------|
| Sb(1)—Rb(1) <sup>1</sup> | 4.1736(4)  | Rb(1)—Sb(1)—Rb(1) <sup>1</sup>              | 81.489(9)  |
| Sb(1)—Rb(1)              | 4.1736(4)  | O(4) <sup>8</sup> —Rb(1)—O(1) <sup>2</sup>  | 113.67(4)  |
| Sb(1)—F(1)               | 1.922(2)   | O(4) <sup>9</sup> —Rb(1)—O(1) <sup>5</sup>  | 122.20(5)  |
| Sb(1)—O(1) <sup>2</sup>  | 2.1462(18) | F(1) <sup>3</sup> —Rb(1)—F(1)               | 129.48(8)  |
| Sb(1)—O(4) <sup>2</sup>  | 2.3179(19) | F(1)—Rb(1)—O(1) <sup>4</sup>                | 62.78(5)   |
| Rb(1)—O(3) <sup>7</sup>  | 4.1736(4)  | F(1) <sup>3</sup> —Rb(1)—O(1) <sup>4</sup>  | 109.12(5)  |
| Rb(1)—O(3) <sup>8</sup>  | 4.1736(4)  | O(4) <sup>10</sup> —Rb(1)—O(4) <sup>9</sup> | 65.78(6)   |
| Rb(1)—O(4) <sup>9</sup>  | 1.922(2)   | O(4)—Rb(1)—O(4) <sup>9</sup>                | 87.77(4)   |
| Rb(1)—O(4) <sup>7</sup>  | 2.1462(18) | O(4) <sup>9</sup> —Rb(1)—O(4) <sup>8</sup>  | 58.29(7)   |
| Rb(1)—O(4) <sup>10</sup> | 2.1462(18) | Rb(1) <sup>7</sup> —S(1)—Rb(1) <sup>8</sup> | 88.785(18) |
| Rb(1)—F(1) <sup>3</sup>  | 3.0121(10) | Rb(1)—S(1)—Rb(1) <sup>8</sup>               | 86.741(16) |
| Rb(1)—O(1) <sup>4</sup>  | 3.3462(19) | O(2)—S(1)—Rb(1) <sup>8</sup>                | 131.35(5)  |
| Rb(1)—O(1) <sup>5</sup>  | 3.3462(19) | O(2)—S(1)—Rb(1)                             | 116.95(12) |
| Rb(1)—O(2) <sup>6</sup>  | 3.129(3)   | O(2)—S(1)—Rb(1) <sup>7</sup>                | 131.35(5)  |
| S(1)—O(4)                | 1.4897(19) | O(1) <sup>12</sup> —P(1)—Rb(1) <sup>5</sup> | 130.28(8)  |
| S(1)—O(2)                | 1.459(3)   | O(1)—P(1)—Rb(1) <sup>11</sup>               | 130.28(8)  |
| S(1)—O(3)                | 1.441(3)   | O(1)—P(1)—Rb(1) <sup>5</sup>                | 57.77(8)   |
| S(1)—O(4)                | 1.4897(19) | O(1)—P(1)—O(1) <sup>12</sup>                | 115.14(17) |
| P(1)—O(1) <sup>11</sup>  | 1.5071(18) | S(1)—O(2)—Rb(1) <sup>13</sup>               | 158.53(17) |
| P(1)—O(1)                | 1.5071(19) | Rb(1)—F(1)—Rb(1) <sup>1</sup>               | 129.48(8)  |

Symmetry codes: (1) +X, 1+Y, +Z; (2) +X, 3/2-Y, +Z; (3) +X, -1+Y, +Z; (4) 1-X, -1/2+Y, 2-Z; (5) 1-X, 1-Y, 2-Z; (6) -1/2+X, +Y, 3/2-Z; (7) 1-X, -Y, 1-Z; (8) 1-X, 1-Y, 1-Z; (9) 1-X, -1/2+Y, 1-Z; (10) +X, 1/2-Y, +Z; (11) 1-X, 2-Y, 2-Z; (12) +X, 5/2-Y, +Z; (13) 1/2+X, +Y, 3/2-Z.

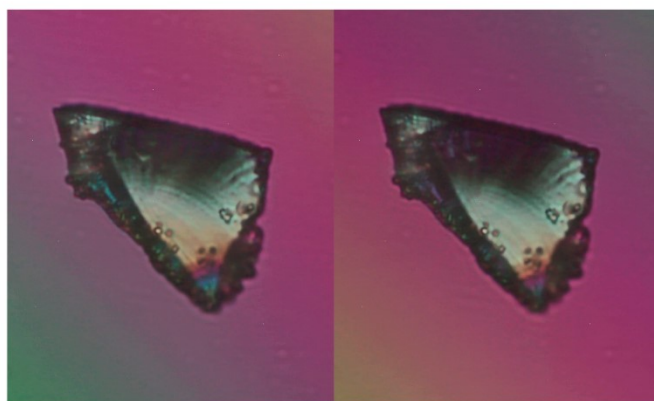

**Fig. S1** The extinction diagram of  $\text{RbSb}(\text{SO}_4)(\text{H}_2\text{PO}_2)\text{F}$  during the birefringence test.
